# Supplementary material for: Spatiotemporal Patterns of Five Small Heat Shock Protein Genes in Hyphantria cunea in Response to Thermal Stress
Source: MDPI journal article supplement (doi:10.3390/ijms242015176), 2023-10-14
Supplement: s1 [file s1]

**Table S1.** The sequence information used for sHSP multiple sequence alignments.

| <i>H.cuneae</i><br>Gene | Abbreviation | Gene Name                           | Species                 | Accession<br>number | Identity |
|-------------------------|--------------|-------------------------------------|-------------------------|---------------------|----------|
| HcHSP18.9               | BbHSP19.4    | heat shock protein 19.4             | Biston betularia        | ADO33017.1          | 78.75%   |
|                         | MsHSP19.3    | heat shock protein 19.3             | Mythimna separata       | ATN45241.1          |          |
|                         | GmHSP18.9    | small heat shock protein 18.9       | Grapholita molesta      | AKS40082.1          |          |
|                         | CsHSP19.0    | heat shock protein 19.0             | Chilo suppressalis      | QYR68970.1          |          |
| HcHSP20.1               | MsHSP19.5    | heat shock protein 19.5             | Mythimna separata       | ATN45242.1          | 80.56%   |
|                         | BmHSP19.5    | 19.5 kDa heat shock protein         | Bombyx mori             | NP_001164470.2      |          |
|                         | EhHSP19.7    | heat shock protein 20-1             | Eogystia hippophaecolus | AYA93247.1          |          |
|                         | ApHSP19.5    | heat shock protein 19.5             | Antheraea pernyi        | APX61064.1          |          |
| HcHSP21.5               | BmHSP20.8    | heat shock protein hsp20.8          | Bombyx mori             | NP_001091794.1      | 83.79%   |
|                         | AsHSP20.8    | heat shock protein sHSP 20.8        | Actias selene           | ALI87024.1          |          |
|                         | GmHSP21.4    | small heat shock protein 21.4       | Grapholita molesta      | AKS40075.1          |          |
|                         | GpHSP21.6    | heat shock protein 21.6             | Glyphodes pyloalis      | QGZ00461.1          |          |
| HcHSP21.4               | SiHSP21.4    | heat shock protein 21.4             | Sesamia inferens        | AJA32863.1          | 99.47%   |
|                         | HaHSP21.4    | heat shock protein hsp21.4          | Helicoverpa armigera    | AGC39039.1          |          |
|                         | BmHSP21.4    | heat shock protein hsp21.4          | Bombyx mori             | NP_001036985.1      |          |
|                         | GmHSP21.3    | small heat shock protein 21.3       | Grapholita molesta      | AKS40074.1          |          |
| HcHSP29.8               | SfHSP29.0    | heat shock protein 29               | Spodoptera frugiperda   | QLR06860.1          | 71.19%   |
|                         | OfHSP29.7    | small heat shock protein<br>Hsp29.7 | Ostrinia furnacalis     | UTU55755.1          |          |
|                         | BmHSP27.4    | alpha-crystallin B chain-like       | Bombyx mandarina        | XP_028036235.1      |          |
|                         | NiHSP28.5    | alpha-crystallin B chain-like       | Nymphalis io            | XP_050345805.1      |          |

**Table S2.** The information on predicted tertiary structures of *H.cuneae* sHSP genes.

| Gene<br>Name | Template                  | SMTL<br>ID             | Identity | GMQE | QMEAN | Substrate<br>state | Specise                  |
|--------------|---------------------------|------------------------|----------|------|-------|--------------------|--------------------------|
| HcHSP18.9    | ALPHA-CRYSTALLIN B        | <a href="#">2wj7.1</a> | 48.86%   | 0.35 | -0.61 | Monomer            | <i>Homo sapiens</i>      |
| HcHSP20.1    | HEAT SHOCK PROTEIN BETA-6 | <a href="#">2wj5.1</a> | 39.44%   | 0.21 | -1.17 | Monomer            | <i>Rattus norvegicus</i> |
| HcHSP21.5    | ALPHA-CRYSTALLIN B        | <a href="#">2y22.1</a> | 54.22%   | 0.29 | -0.29 | Monomer            | <i>Homo sapiens</i>      |
| HcHSP21.4    | HEAT SHOCK PROTEIN BETA-6 | <a href="#">2wj5.1</a> | 40.24%   | 0.26 | -0.24 | Monomer            | <i>Rattus norvegicus</i> |
| HcHSP29.8    | ALPHA-CRYSTALLIN B        | <a href="#">2y22.1</a> | 32.43%   | 0.17 | -0.6  | Monomer            | <i>Homo sapiens</i>      |

**Table S3.** The sequence information used for phylogenetic analysis of sHSPs.

| Abbreviation | Gene Name                            | GeneBank No.   | Species                          | Family      |
|--------------|--------------------------------------|----------------|----------------------------------|-------------|
| LdHSP21.6    | heat shock protein beta-1            | XP_023025087.1 | <i>Leptinotarsa decemlineata</i> | Coleoptera  |
| AgHSP21.6    | heat shock protein beta-1 isoform X2 | XP_012279730.1 | <i>Anoplophora glabripennis</i>  | Coleoptera  |
| LserHSP21.8  | heat shock protein 21.8              | QWV59571.1     | <i>Lasioderma serricorne</i>     | Coleoptera  |
| OaHSP21.5    | heat shock protein beta-1 isoform X2 | XP_012279730.1 | <i>Orussus abietinus</i>         | Hymenoptera |
| TcHSP21.5    | heat shock protein beta-1 isoform X2 | XP_024880994.1 | <i>Temnothorax curvispinosus</i> | Hymenoptera |
| PpHSP21.7    | small heat shock protein             | EM45800.1      | <i>Pteromalus puparum</i>        | Hymenoptera |
| PxHSP21.6    | small heat shock protein             | AHW45924.1     | <i>Plutella xylostella</i>       | Lepidoptera |
| SfHSP21.4    | heat shock protein                   | QNN88706.1     | <i>Spodoptera frugiperda</i>     | Lepidoptera |
| CsHSP21.4    | heat shock protein 21.4              | AGC23338.1     | <i>Chilo suppressalis</i>        | Lepidoptera |
| BdHSP20.6    | heat shock protein hsp20.6           | ARQ14799.1     | <i>Bactrocera dorsalis</i>       | Diptera     |
| BdHSP23.8    | heat shock protein hsp23.8           | ARQ14802.1     | <i>Bactrocera dorsalis</i>       | Diptera     |
| RpHSP22.1    | heat shock protein 23-like           | XP_036340981.1 | <i>Rhagoletis pomonella</i>      | Diptera     |
| BdHSP23.0    | heat shock protein hsp23.0           | ARQ14801.1     | <i>Bactrocera dorsalis</i>       | Diptera     |
| HcHSP16.0    | small heat shock protein 16.0        | QPZ75080.1     | <i>Hyphantria cunea</i>          | Lepidoptera |
| SfHSP29.0    | heat shock protein                   | QNN88710.1     | <i>Spodoptera frugiperda</i>     | Lepidoptera |
| PxHSP19.2    | small heat shock protein             | AHW45925.1     | <i>Plutella xylostella</i>       | Lepidoptera |
| SfHSP19.1    | heat shock protein                   | QQZ19789.1     | <i>Spodoptera frugiperda</i>     | Lepidoptera |
| SfHSP21.9    | heat shock protein                   | QNN88707.1     | <i>Spodoptera frugiperda</i>     | Lepidoptera |
| HcHSP22.1    | small heat shock protein 22.1        | QPZ75082.1     | <i>Hyphantria cunea</i>          | Lepidoptera |
| CsHSP21.7    | heat shock protein 21.7A             | AGC23336.1     | <i>Chilo suppressalis</i>        | Lepidoptera |
| PxHSP21.8    | small heat shock protein             | AHW45926.1     | <i>Plutella xylostella</i>       | Lepidoptera |
| BdHSP21.6    | heat shock protein hsp21.6           | ARQ14800.1     | <i>Bactrocera dorsalis</i>       | Diptera     |
| LsHSP21.3    | heat shock protein Hsp21.3           | ABE57138.1     | <i>Liriomyza sativae</i>         | Diptera     |
| LsHSP21.7    | heat shock protein Hsp21.7           | ABE57139.1     | <i>Liriomyza sativae</i>         | Diptera     |
| LsHSP19.5    | heat shock protein Hsp19.5           | ABE57140.1     | <i>Liriomyza sativae</i>         | Diptera     |
| OcHSP21.1    | heat shock protein 21.1              | AJP36909.1     | <i>Oxya chinensis</i>            | Orthoptera  |
| OcHSP20.7    | heat shock protein 20.7              | AJP36908.1     | <i>Oxya chinensis</i>            | Orthoptera  |
| SgHSP20.7    | heat shock protein 20.7              | AEV89760.1     | <i>Schistocerca gregaria</i>     | Orthoptera  |
| LmHSP20.7    | heat shock protein 20.7              | ABC84494.1     | <i>Locusta migratoria</i>        | Orthoptera  |
| OcHSP20.4    | heat shock protein 20.4              | AJP36907.1     | <i>Oxya chinensis</i>            | Orthoptera  |
| LmHSP20.5    | heat shock protein 20.5              | ABC84492.1     | <i>Locusta migratoria</i>        | Orthoptera  |
| MhHSP22.0    | putative small heat shock protein    | ABM55532.1     | <i>Maconellicoccus hirsutus</i>  | Hemiptera   |
| EpHSP21.7    | heat shock protein 21.7              | AGE92594.1     | <i>Ericerus pela</i>             | Hemiptera   |
| LstrHSP22.0  | small heat shock protein 22.0        | AYP00114.1     | <i>Laodelphax striatellus</i>    | Hemiptera   |
| LstrHSP21.4  | small heat shock protein 21.4        | AYP00112.1     | <i>Laodelphax striatellus</i>    | Hemiptera   |
| LstrHSP21.2  | small heat shock protein 21.2        | AYP00111.1     | <i>Laodelphax striatellus</i>    | Hemiptera   |
| LstrHSP20.1  | small heat shock protein 20.1        | AYP00110.1     | <i>Laodelphax striatellus</i>    | Hemiptera   |
| LserHSP22.2  | small heat shock protein 22.2        | QDZ38466.1     | <i>Lasioderma serricorne</i>     | Coleoptera  |
| LserHSP20.9  | heat shock protein 21                | QWV59569.1     | <i>Lasioderma serricorne</i>     | Coleoptera  |

|             |                               |            |                              |             |
|-------------|-------------------------------|------------|------------------------------|-------------|
| LserHSP20.2 | small heat shock protein 20.2 | QDZ38462.1 | <i>Lasioderma serricorne</i> | Coleoptera  |
| AhHSP20.8   | sHSP20.8                      | QNJ44844.1 | <i>Agasicles hygrophila</i>  | Coleoptera  |
| AhHSP21.5   | sHSP21.5                      | QNJ44846.1 | <i>Agasicles hygrophila</i>  | Coleoptera  |
| AhHSP21.0   | sHSP21                        | QNJ44844.1 | <i>Agasicles hygrophila</i>  | Coleoptera  |
| PxHSP20.1b  | small heat shock protein      | AHW45918.1 | <i>Plutella xylostella</i>   | Lepidoptera |
| CsHSP24.3   | heat shock protein 24.3       | ASK86231.1 | <i>Chilo suppressalis</i>    | Lepidoptera |
| PxHSP20.1a  | small heat shock protein      | AHW45919.1 | <i>Plutella xylostella</i>   | Lepidoptera |
| SfHSP19.7   | heat shock protein            | QQZ19788.1 | <i>Spodoptera frugiperda</i> | Lepidoptera |
| HcHSP20.0   | small heat shock protein 20.0 | QPZ75079.1 | <i>Hyphantria cunea</i>      | Lepidoptera |
| PxHSP23.4   | small heat shock protein      | AHW45920.1 | <i>Plutella xylostella</i>   | Lepidoptera |
| SfHSP20.1   | heat shock protein            | QNN88703.1 | <i>Spodoptera frugiperda</i> | Lepidoptera |
| HcHSP20.3   | small heat shock protein 20.3 | QPZ75081.1 | <i>Hyphantria cunea</i>      | Lepidoptera |
| CsHSP19.0   | heat shock protein 19.0       | QYR68970.1 | <i>Chilo suppressalis</i>    | Lepidoptera |
| SfHSP19.4   | heat shock protein            | QNN88700.1 | <i>Spodoptera frugiperda</i> | Lepidoptera |
| AcHSP22.6   | sHSP22.6                      | AGX26086.1 | <i>Apis cerana cerana</i>    | Hymenoptera |
| McHSP23.8   | small heat shock protein      | ACF21815.1 | <i>Macrocentrus cingulum</i> | Hymenoptera |
| AcHSP24.9   | small heat shock protein      | AEH05929.1 | <i>Apis cerana cerana</i>    | Hymenoptera |

**Table S4.** The motif analysis of sHSP sequences.

| Motif | Sites | Width | E-value   | Logo |
|-------|-------|-------|-----------|------|
| 1     | 61    | 21    | 2.5e-618  |      |
| 2     | 61    | 31    | 1.0e-996  |      |
| 3     | 61    | 15    | 1.2e-517  |      |
| 4     | 39    | 24    | 1.2e-376  |      |
| 5     | 10    | 50    | 1.0e-349  |      |
| 6     | 44    | 21    | 2.40E-280 |      |
| 7     | 40    | 15    | 2.30E-195 |      |
| 8     | 40    | 11    | 3.70E-97  |      |
| 9     | 41    | 8     | 5.00E-84  |      |
| 10    | 10    | 20    | 6.30E-81  |      |
| 11    | 10    | 15    | 3.20E-49  |      |
| 12    | 10    | 11    | 1.90E-27  |      |

**Table S5.** Significance analysis of gene expression levels of *HcHSPs* at different developmental stages.

| Developmental stage | HcHSP18.9    | HcHSP20.1     | HcHSP21.5       | HcHSP21.4   | HcHSP29.8   |
|---------------------|--------------|---------------|-----------------|-------------|-------------|
| E                   | 1.23±0.35d   | 36.37±9.26c   | 251.58±88.29bc  | 0.95±0.03d  | 4.93±0.59b  |
| 2L                  | 1.08±0.32d   | 1.03±0.17e    | 1.04±0.22e      | 1.01±0.12d  | 1.02±0.14c  |
| 4L                  | 0.58±0.04d   | 7.78±1.12d    | 5.2±1.04d       | 0.88±0.07d  | 0.23±0.03d  |
| 6L                  | 0.64±0.04d   | 1.89±0.52e    | 1.82±0.16de     | 0.69±0.18d  | 0.04±0e     |
| FP                  | 48.01±3.66a  | 67.79±6.8bc   | 370.18±17.25b   | 3.81±0.67c  | 14.28±1.62a |
| MP                  | 15.48±2.37b  | 401.72±40.92a | 324.67±39.33b   | 5.27±0.5bc  | 13.53±0.49a |
| FA                  | 5.36±0.86c   | 644.92±74.15a | 8195.94±795.49a | 8.94±1.13b  | 11.84±0.9a  |
| MA                  | 32.01±3.52ab | 98.32±12.21b  | 77.14±12.27c    | 44.02±5.02a | 23.58±4.97a |

**Table S6.** Significance analysis of gene expression levels of *HcHSPs* at different developmental stages under heat stress conditions.

| Developmental stage | Temperature | HcHSP18.9      | HcHSP20.1         | HcHSP21.5        | HcHSP21.4    | HcHSP29.8      |
|---------------------|-------------|----------------|-------------------|------------------|--------------|----------------|
| E                   | 25°C        | 1.1±0.31Ab     | 1.09±0.27Ab       | 1.21±0.42Ab      | 1±0.03Aa     | 1.01±0.12Ab    |
|                     | 30°C        | 3.82±1.26Aab   | 1.62±0.22BCb      | 0.23±0.08Dc      | 1.63±0.66Aa  | 1.29±0.24Cb    |
|                     | 35°C        | 6.52±0.32Bab   | 4.79±1.42Eb       | 0.99±0Cb         | 0.66±0.17Ba  | 0.62±0.14Cb    |
|                     | 40°C        | 12.54±3.42CDa  | 361.63±65.33Ba    | 10.29±0.58Da     | 2.68±1.21Aa  | 9.35±2.57ABa   |
|                     | 43°C        | 9.41±6.03Bab   | 193.22±24.76Ea    | 5.71±1.57Da      | 1.77±0.72Aa  | 0.71±0.49Db    |
| 2L                  | 25°C        | 1.08±0.32Ab    | 1.03±0.17Ad       | 1.07±0.29Ad      | 1.01±0.12Aa  | 1.02±0.14Ac    |
|                     | 30°C        | 1.8±0.08Ab     | 5.33±0.17Ac       | 4.47±0.29Ac      | 1.07±0.09Aa  | 2.69±0.72ABCbc |
|                     | 35°C        | 8.69±0.68Ba    | 199.33±14.59Ab    | 67.36±0.32Ab     | 1.21±0.08Aa  | 6.08±0.11Aab   |
|                     | 40°C        | 6.41±2.1Da     | 2459.41±1103.95Aa | 995.15±474.68Aa  | 0.23±0.02Cb  | 9.08±3.7ABa    |
|                     | 43°C        | 7.53±1.09Ba    | 658.67±23.26Da    | 484.81±46.69Ba   | 0.2±0.03Bb   | 1.35±0.14CDc   |
| 4L                  | 25°C        | 1±0.06Ae       | 1.02±0.14Ad       | 1.04±0.2Ad       | 1.01±0.1Ab   | 1.02±0.17Ad    |
|                     | 30°C        | 2.47±0.18Ad    | 1.29±0.23BCd      | 1.22±0.1BCd      | 1.09±0.04Aab | 4.1±0.88Ac     |
|                     | 35°C        | 7.61±0.74Bc    | 117.13±20.63ABc   | 14.99±2.7Bc      | 1.41±0.05Aa  | 7.88±0.44Ab    |
|                     | 40°C        | 37.22±1.56Bb   | 526.15±29.27Bb    | 153.74±13.7Bb    | 1.13±0ABab   | 13.6±0.97Aab   |
|                     | 43°C        | 109.37±13.98Aa | 1347.29±127.04BCa | 472.29±43.27Ba   | 1.17±0.1Aab  | 21.02±2.32Aa   |
| 6L                  | 25°C        | 1±0.07Ac       | 1.07±0.29Ad       | 1±0.09Ae         | 1.02±0.16Aa  | 1.02±0.15Ac    |
|                     | 30°C        | 3.24±1.09Abc   | 2.29±0.43Bd       | 3.04±0.99ABd     | 1.13±0.15Aa  | 3.18±0.22ABb   |
|                     | 35°C        | 6.5±1.01Bb     | 84.55±12.25BCc    | 46.43±5.59Ac     | 1.09±0.02Aa  | 4.25±0.75ABb   |
|                     | 40°C        | 10.96±3.54CDb  | 478.64±10.05Bb    | 602.75±58.89Ab   | 0.92±0.07Ba  | 17.52±4.43Aa   |
|                     | 43°C        | 67.06±26.07Aa  | 3343.04±842.47Aa  | 1935.61±489.89Aa | 1.93±0.56Aa  | 39.01±10.7Aa   |
| FP                  | 25°C        | 1±0.07Ac       | 1.01±0.1Ad        | 1±0.04Ad         | 1.03±0.18Aa  | 1.01±0.11Ad    |
|                     | 30°C        | 2.41±0.3Ab     | 1.35±0.14BCd      | 5.34±0.23Ac      | 1.01±0.04Aa  | 2.37±0.17ABCc  |
|                     | 35°C        | 7.28±0.68Ba    | 27.43±0.58Dc      | 17.75±1.74Bb     | 0.89±0.03ABa | 5.9±0.95Ab     |
|                     | 40°C        | 9.1±0.32Da     | 350.54±12.6Bb     | 63.54±1.69BCa    | 0.88±0.05Ba  | 9.35±0.18Aa    |
|                     | 43°C        | 8.19±0.47Ba    | 671.22±17.57CDa   | 59.2±4.92Ca      | 0.54±0.03ABb | 3.63±0.21BCc   |
| MP                  | 25°C        | 1.02±0.15Ad    | 1.01±0.1Ad        | 1.01±0.12Ad      | 1±0.09Aa     | 1±0.03Ad       |
|                     | 30°C        | 2.2±0.31Ad     | 1.4±0.12BCd       | 3.28±0.68ABc     | 0.99±0.1Aa   | 2.83±0.31ABCc  |
|                     | 35°C        | 9.33±1.09Bc    | 43.01±3.06CDc     | 15.43±0.74Bb     | 1.04±0.01ABa | 6.83±0.34Ab    |

|    |      |                |                   |                |              |               |
|----|------|----------------|-------------------|----------------|--------------|---------------|
|    | 40°C | 30.58±7.15BCb  | 763.68±102.16ABb  | 54±1.77Ca      | 0.94±0.02Ba  | 7.71±0.85ABb  |
|    | 43°C | 76.97±5.08Aa   | 1652.55±60.2ABa   | 80.78±5.97Ca   | 1±0.11Aa     | 12.03±1.06ABa |
| FA | 25°C | 1.02±0.16Ad    | 1.01±0.11Ac       | 1±0.09Ab       | 1.01±0.12Aa  | 1±0.07Ac      |
|    | 30°C | 2.84±0.06Ac    | 1.05±0.18Cc       | 1.02±0.17Cb    | 0.95±0.04Aa  | 1.77±0.1ABCb  |
|    | 35°C | 20.76±3.14Ab   | 4.23±0.17Eb       | 1.4±0.1Cb      | 1.28±0.17Aa  | 2.19±0.2Bab   |
|    | 40°C | 112.66±5.96Aa  | 92.25±17.53Ca     | 4.04±0.19Ea    | 0.98±0.01Ba  | 2.63±0.3Cab   |
|    | 43°C | 111.13±26.27Aa | 145.71±25.33Ea    | 4.54±0.97Da    | 0.81±0.12Aa  | 2.81±0.15Ca   |
| MA | 25°C | 1.01±0.11Ad    | 1.01±0.12Ac       | 1.02±0.16Ad    | 1.01±0.11Aa  | 1.04±0.21Ab   |
|    | 30°C | 1.42±0.26Ad    | 1.29±0.2BCc       | 5.04±0.38Ac    | 1.57±0.23Aa  | 1.5±0.39BCab  |
|    | 35°C | 23.78±4.12Ac   | 51.37±14.18CDb    | 71.9±16.66Ab   | 1.27±0.13Aa  | 2.48±0.53Bab  |
|    | 40°C | 136.45±6.75Aa  | 1980.18±76.99Aa   | 648.79±12.53Aa | 1.56±0.11ABa | 3.22±0.39BCa  |
|    | 43°C | 68.41±6.42Ab   | 1855.56±252.54ABa | 527.45±58.31Ba | 1.27±0.13Aa  | 1.82±0.33Cab  |

Note: Different lowercase letters indicate significant differences among the different temperature treatments at the same developmental stage, and capital letters are used for different developmental stages at the same temperature. Significance was determined via analysis of variance ( $p < 0.05$ ).

**Table S7.** Significance analysis of gene expression levels of *HcHSPs* in different tissues before and after being subject to heat stress conditions.

| Treatment | Tissue          | HcHSP18.9          | HcHSP20.1          | HcHSP21.5            | HcHSP21.4      | HcHSP29.8       |
|-----------|-----------------|--------------------|--------------------|----------------------|----------------|-----------------|
| 25°C      | Gut             | 0.14±0.02bc        | 0.38±0.17ab        | 5.15±1.79ab          | 4.67±1.12ab    | 0.04±0.01bc     |
|           | Malpighian tube | 0.06±0.03bcd       | 0.13±0.04bc        | 0.59±0.23cd          | 7.36±1.61ab    | 0.57±0.32a      |
|           | Silk gland      | 0.01±0d            | 0.05±0.01c         | 0.17±0.08d           | 4.68±2.09ab    | 0±0c            |
|           | Hemolymph       | 0.03±0.01cd        | 0.14±0.04bc        | 21.36±7.1a           | 2.1±0.47b      | 0.02±0bc        |
|           | Fat body        | 0.29±0.09ab        | 0.23±0.04abc       | 1.51±0.34bc          | 5.54±0.98ab    | 0.04±0.01ab     |
|           | Cuticle         | 1.11±0.18a         | 0.76±0.13a         | 2.37±0.48bc          | 13.86±4.11a    | 0.5±0.14a       |
| 43°C      | Gut             | 13.69±1.92C ***    | 218.40±87.08B ***  | 566.36±137.63 AB *** | 5.33±1.06BC ns | 0.29±0.06C *    |
|           | Malpighian tube | 59.61±20.25B ***   | 270.8±34.07B ***   | 762.97±42.22 AB ***  | 8.23±0.42B ns  | 3.81±0.11AB *   |
|           | Silk gland      | 20.84±2.84BC ***   | 182.81±19.64B ***  | 327.8±12.12 bc ***   | 5.77±0.68BC ns | 0.45±0.07CD *** |
|           | Hemolymph       | 32.37±6.09BC ***   | 170.56±48.72B ***  | 596.51±221.03 AB **  | 3.04±0.4C ns   | 1.77±0.43BC *** |
|           | Fat body        | 25.49±3.75BC ***   | 241.75±7.664B ***  | 502.97±19.51B ***    | 11.37±1.44B *  | 2.97±0.576B *** |
|           | Cuticle         | 638.72±228.09A *** | 971.42±229.88A *** | 1381.07±276.81 A *** | 48.22±11.21A * | 14.53±6.92A **  |

Note: Different lowercase letters indicate significant differences between different tissues under 25°C treatment, and capital letters are used for significant differences between different tissues under 43°C treatment ( $P < 0.05$ ). The significant differences between 25°C control treatments and 43°C treatments in the same tissue are indicated by an asterisk (\*), corresponding to  $P < 0.05$  level (\*),  $P < 0.01$  level (\*\*), and  $P < 0.001$  level (\*\*\*), while ns indicates results that are not significant.
